# Supplementary material for: Spatial Complementarity and the Coexistence of Species
Source: PubMed Central journal article supplement (PMC4274010; doi:10.1371/journal.pone.0114979), 2014-12-22
Supplement: pone.0114979.s008.pdf [file pone.0114979.s008.pdf]

## 1 Supplementary Note S4

### 2 Ecological pressure, competition across generations and the triadic mechanism

3 Here we identify the role of inter-generational competition in maintaining coexistence through the triadic  
 4 mechanism. In order to simplify the notation, all the sub-indexes have been omitted to express that the  
 5 corresponding symbol is in a vector form, i.e.

$$\begin{aligned}
 P &:= (P_1, P_2) \\
 \rho &:= (\rho_1, \rho_2) \\
 \kappa &:= (\{\kappa_{i,j}^{(b)}\}, \{\kappa_{i,j}^{(c)}\}) \\
 \frac{\partial}{\partial \rho} &:= \left( \frac{\partial}{\partial \rho_1}, \frac{\partial}{\partial \rho_2} \right) \\
 \frac{\partial}{\partial \kappa} &:= \left( \left\{ \frac{\partial}{\partial \kappa_{i,j}^{(b)}} \right\}, \left\{ \frac{\partial}{\partial \kappa_{i,j}^{(c)}} \right\} \right)
 \end{aligned}$$

6 and  $A \cdot B$  denotes the product of  $A$  and  $B$ . If  $A_{i,j}$  is an arbitrary quantity with sub-indices  $i, j$ , then  
 7  $\{A_{i,j}\} := (A_{1,1}, A_{1,2}, A_{2,1}, A_{2,2})$ .

8 By definition of the ecological pressure we have

$$\rho(t + \delta t) - \rho(t) = - \int_t^{t+\delta t} P(t') dt' \tag{1}$$

9 Writing  $P(t')$  as a Taylor expansion around  $t$  and taking the integral we find

$$\rho(t + \delta t) - \rho(t) = -P(t)\delta t - \dot{P}(t)\frac{(\delta t)^2}{2} + \dots \tag{2}$$

10 On the other hand, ecological pressure alters through time due to changes in the state variables, which  
 11 are the  $\rho$  and the  $\kappa$  terms, i.e.  $P(\rho(t), \kappa(t))$ . Thus,

$$\rho(t + \delta t) - \rho(t) = -P(\rho(t), \kappa(t))\delta t - \frac{\partial P}{\partial \rho} \cdot \dot{\rho} \frac{(\delta t)^2}{2} - \frac{\partial P}{\partial \kappa} \cdot \dot{\kappa} \frac{(\delta t)^2}{2} \dots \tag{3}$$

12 For  $\delta t \ll 1$  we have

$$\delta\rho(t) \approx -P(\rho(t), \kappa(t))\delta t \quad (4)$$

13 As a thought experiment, consider planting a cohort of individuals at time  $t$  with a random pattern.  
14 Over short periods of time  $P$  depends only on the individuals that are alive at time  $t$  (the individuals  
15 that were planted), meaning that only these individuals contribute to the immediate change in density.  
16 Equation (4) also indicates that the next generation of individuals doesn't play an active role in the  
17 production of new offspring in the short-term following the initial planting. As has been demonstrated  
18 previously, the triadic mechanism cannot be explained with the relation (4), meaning it is expressed over  
19 longer time periods. It also means that the activity of the initial population is not sufficient to generate  
20 the mechanism. In other words, the triadic mechanism is expressed only once the first offspring take an  
21 active role in the generation of new individuals. From this we can infer that the forces of this mechanism  
22 are first felt by the grandchildren of the original cohort.
