# Supplementary material for: Spatial Complementarity and the Coexistence of Species
Source: PLOS journal article supplement (doi:10.1371/journal.pone.0114979), 2014-12-22
Supplement: S6 (10.1371/journal.pone.0114979.s006) [file journal.pone.0114979.s006]

## Supplementary Note S2

### General derivation of the spatial Lotka-Volterra model

The mean population dynamics of species  $i$  with abundance  $N$  under mean-field conditions are described by the following general equation:

$$\dot{N}_i = N_i b_i \left( 1 - \sum_j \rho_{j,i}^{eff(b)} \right) - N_i d_i - \sum_j \rho_{i,j}^{eff(c)} c_{i,j} N_j \quad (1)$$

where  $\rho_{j,i}^{eff(b)}$  is the mean density of species  $j$  that on average an individual of species  $i$  experiences when attempting to disperse, and  $\rho_{i,j}^{eff(c)}$  is the mean density of species  $i$  that on average an individual of species  $j$  experiences as a result of competitive interactions.

For a generalised dispersal kernel  $w_{j,i}^{(b)}(r)$ ,  $\rho_{j,i}^{eff(b)}$  can be expressed as

$$\rho_{j,i}^{eff(b)} = \rho_j \kappa_{j,i}^{(b)} \quad (2)$$

where  $\kappa_{j,i}^{(b)} = 2\pi \int w_{j,i}^{(b)}(r) g_{j,i}(r) r dr$  and  $g_{j,i}(r)$  is the pair correlation function (see equation (1) in Methods).

Likewise  $\rho_{i,j}^{eff(c)}$  can be expressed as

$$\rho_{i,j}^{eff(c)} = \rho_i \kappa_{i,j}^{(c)} \quad (3)$$

where  $\kappa_{i,j}^{(c)} = 2\pi \int w_{i,j}(r) g_{i,j}(r) r dr$  and  $w_{i,j}(r)$  is the competition kernel.

Dividing by the field area and substituting (2) and (3) in (1), we find an explicit spatial version of the Lotka-Volterra model (as equation (2) in Methods):

$$\dot{\rho}_i = \rho_i b_i \left( 1 - \sum_j \rho_j \kappa_{j,i}^{(b)} \right) - \rho_i d_i - \rho_i \sum_j \kappa_{i,j}^{(c)} c_{i,j} \rho_j \quad (4)$$

The  $\kappa$  values hold information regarding how the effective density deviates from the mean density.  $\kappa$  can also be seen as the factor that quantifies how the competition rates change due to the spatial structure.

In our simulations  $w_{j,i}^{(b)}(r) = \Theta(\sigma_{j,i}^{(b)} - r) / (\sigma_{j,i}^{(b)})^2 \pi$  and  $w_{i,j}^{(c)}(r) = \Theta(\sigma_{i,j}^{(c)} - r) / (\sigma_{i,j}^{(c)})^2 \pi$ , where  $\Theta(r)$  is defined to be 1 if  $r \geq 0$  and 0 otherwise. This makes  $\kappa$  equivalent to Ripley's  $K(r)$  function [1, 2] divided by the area of integration, i.e.  $\kappa_{j,i}^{(b)} = K(\sigma_{j,i}^{(b)}) / (\sigma_{j,i}^{(b)})^2 \pi$  and  $\kappa_{i,j}^{(c)} = K(\sigma_{i,j}^{(c)}) / (\sigma_{i,j}^{(c)})^2 \pi$ . The more generalised

derivation provided above allows for alternative kernels for either dispersal or competition to be fitted.

## References

1. Ripley B (1977) Modelling spatial patterns. *Journal of the Royal Statistical Society Series B* 39: 172–212.
2. Haase P (1995) Spatial pattern analysis in ecology based on Ripley's K-function: Introduction and methods of edge correction. *Journal of Vegetation Science* 6: 575–582.
